# Supplementary material for: Intervention of resource allocation strategies on spatial spread of epidemic
Source: Research Square preprint supplement (doi:10.21203/rs.3.rs-792903/v1), 2021-08-17
Supplement: Supplementary file 1 [file e9463e14181ebf3613f1a870.pdf]

# Supplementary Information

## Model description

Facing the outbreak of the epidemic, each subpopulation can generate resources for fighting against the disease at each time step. In reality, infected individuals consume various medical resources, but susceptible individuals are responsible for resource production. So we reasonably assume that the amount of resources produced by one subpopulation are positively correlated to its current proportion of susceptible individuals. Accordingly, we define the resources production  $r_i(t)$  of subpopulation  $i$  at time  $t$  as follows:

$$r_i(t) = \theta[1 - \rho_i(t)], \quad (S1)$$

where  $\rho_i(t)$  is the ratio of infected individuals in subpopulation  $i$  at time  $t$ , and  $\theta (\geq 1)$  is the coefficient denoted as resource production strength. Higher  $\theta$  means a faster speed on resource production.

With the emergence of infected individuals in neighboring subpopulations of subpopulation  $i$ , subpopulation  $i$  would release resources to suppress the disease. Usually, not all resources could be donated because of the need for self-protection. Besides, we consider the amount of resources that one of its neighboring subpopulation  $j$  can receive at time  $t$  is proportional to its number of infected individuals among all neighbors. Accordingly, the resource donation  $\omega_{i \rightarrow j}(t)$  that subpopulation  $i$  releases to  $j$  at time  $t$  can be denoted as follows:

$$\omega_{i \rightarrow j}(t) = r_i(t) \cdot q_i(t) \cdot \frac{I_j(t)}{\sum_{k \in V(i)} I_k(t)}, \quad (S2)$$

where  $\sum_{k \in V(i)} I_k(t)$  is the total number of infected individuals in the neighboring subpopulation set  $V(i)$  of subpopulation  $i$ ,  $I_j(t)$  is the number of infected individuals belonging to neighbor  $j$ , and  $q_i(t)$  is donation will of subpopulation  $i$  at time  $t$ .

When an epidemic breaks out, one subpopulation  $i$  can perceive this threat intuitively by acquiring the information from neighbors. So, to quantify the response strength of a subpopulation to the information of disease, a parameter  $\alpha \in [0, 1]$  denoting awareness is introduced, and a higher  $\alpha$  means less resources will be donated. Usually, the more infected individuals around a subpopulation, the more resources are supposed to be donated to them. Hence, we assume that the donation will of subpopulation  $i$  increases with the ratio of infected individuals around it. Based on the above description, we define donation will  $q_i(t)$  of subpopulation  $i$  at time  $t$  as follows:

$$q_i(t) = q_0 \cdot (1 - \alpha) \cdot \frac{1}{1 + e^{-\beta(m_i(t) - 0.5)}}, \quad (S3)$$

where  $q_0$  is basic donation factor,  $m_i(t)$  is the ratio of infected individuals in all neighboring subpopulations of  $i$  at time  $t$ , and coefficient  $\beta (\geq 0)$  represents the donation sensitivity. The third

submultiple on the right side of Eq. (S3) is a sigmoid function which represents donation sensitivity to the infection. A smaller  $\beta$  means the subpopulation is more sensitive to degree of infection around the neighboring subpopulations. The smaller  $\beta$  indicates that donation will gets a higher initial value and increases steadily with  $m_i(t)$  with a less slope., and particularly the sigmoid function keeps a fixed value of 0.5 if  $\beta=0$  (see Fig. S1). Besides, the constant 0.5 in the sigmoid function restricts its value in the range  $[0, 1]$ . The function obtains 0.5 when  $m_i(t)=0.5$ , and when  $m_i(t)<0.5$ , the function is less than 0.5, and vice versa. That is, how many resources will be donated depends on the value of  $m_i(t)$ . Naturally,  $m_i(t)$  is expressed as follows:

$$m_i(t) = \frac{\sum_{k \in V(i)} I_k(t)}{\sum_{k \in V(i)} N_k}, \quad (S4)$$

where  $\sum_{k \in V(i)} N_k$  is the total number of individuals traversing neighboring subpopulation set  $V(i)$  of subpopulation  $i$ , and  $\sum_{k \in V(i)} I_k(t)$  has been mentioned above.

When infected individuals emerge around subpopulation  $i$ , it intends to donate resources to neighbors to suppress diseases, and protects itself from infection as well. However, donating resources may lead to an increasing risk of infection due to the lack of sufficient resources for self-protection. Hence, we consider a penalty coefficient  $c$  ( $\geq 1$ ) for modified infection rate,  $\lambda_i(t)$ , of subpopulation  $i$  after donating resources at time  $t$ , and  $\lambda_i(t)$  is expressed as

$$\lambda_i(t) = q_i(t)c\lambda + [1 - q_i(t)]\lambda, \quad (S5)$$

where  $\lambda$  is the basic infection rate, and  $q_i(t)$  is donation will at time  $t$  as mentioned above. From Eq. (S5), the infection rate recovers a constant  $\lambda$  if  $c=1$ , i.e., there is no impact when donating resources to others. On the contrary, if  $c>1$ , there is a relatively higher infection rate when donating resources. The above definition means that the infection rate usually varies from subpopulation to subpopulation with time.

In general, a subpopulation can generate resources by itself or receive from others. So, the resources that a subpopulation  $i$  holds at time  $t$  are expressed as follows

$$\omega_i(t) = r_i(t) \bullet [1 - q_i(t)] + \sum_{j \in V(i)} \omega_{j \rightarrow i}(t), \quad (S6)$$

where the first term denotes its remaining resources after donating resources and the second denotes the resources received from others. Generally, a subpopulation has a higher recovery rate if it holds more resources. So, the recovery rate of subpopulation  $i$  at time  $t$ ,  $\mu_i(t)$ , can be defined as

$$\mu_i(t) = 1 - (1 - \mu)^{1 + \varepsilon \omega_i(t)}, \quad (S7)$$

where  $\mu$  is the basic recovery rate, and  $\varepsilon \in [0, 1]$  is resource utilization rate. From Eq. (S7), we can see that recovery rate of subpopulation  $i$  keeps the basic recovery rate  $\mu$  if  $\varepsilon=0$  or without resources; otherwise, the recovery rate increases with the growth of holding resources  $\omega_i(t)$ , and the recovery rate  $\mu_i(t) \rightarrow 1$  when  $\omega_i(t)$  is sufficiently large. Similarly, the recovery rate generally varies from subpopulation to subpopulation with time.

68

**Supplementary Table 1. Involved parameters in the MIR metapopulation network model**

| Parameter     | Definition                                            | Default value |
|---------------|-------------------------------------------------------|---------------|
| $\lambda$     | Basic infection rate                                  | -             |
| $\mu$         | Basic recovery rate                                   | 0.2           |
| $p$           | Migration probability                                 | 0.2           |
| $c$           | Penalty coefficient for infection rate after donation | 2.0           |
| $\varepsilon$ | Resource utilization rate                             | 0.6           |
| $q_0$         | Basic donation factor                                 | 0.8           |
| $\theta$      | Resource production strength                          | -             |
| $\alpha$      | Resource donation awareness                           | -             |
| $\beta$       | Resource donation sensitivity                         | -             |

69

70

71

72

Unless extra specifications, the default values of other parameters are set as  $\mu=0.2$ ,  $q_0=0.8$ ,  $\varepsilon=0.6$ ,  $c=2.0$ , and  $p=0.2$ .

## 73 Microscopic Markov chain method and threshold analysis

74

75

76

77

78

Based on the above mode description, we construct a metapopulation network model composed a total of  $N$  subpopulations. Each subpopulation  $i$  has a number of  $n_i$  individuals,  $\forall i=1, 2, \dots, N$ . At the migration stage, an individual leaves its resident subpopulation  $i$  with probability  $p$ , and migrates to one of its neighboring subpopulations  $j$  in terms of the transition matrix  $\mathbf{R}$ , whose entries are  $R_{ij} = \frac{W_{ij}}{\sum_{j=1}^N W_{ij}}$ , where  $W_{ij}$  denotes the weight between subpopulation  $i$  and  $j$ . Then, once individuals have moved, they interact in a well-mixed way in each subpopulation  $i$  and change their epidemic status in terms of current infection rate  $\lambda_i(t)$  and recovery rate  $\mu_i(t)$  at time  $t$  based on SIS model. Finally, they return to their resident subpopulation and next time step starts.

82

83

There are  $N$  variables  $\rho_i(t)$  denoting the ratio of infected individuals associated with subpopulation  $i$  at time  $t$ . The time evolution of  $\rho_i(t)$  can be written as follows

84

$$\rho_i(t+1) = \rho_i(t) \left[ (1-p)(1-\mu_i(t)) + p \sum_{j=1}^N R_{ij}(1-\mu_j(t)) \right] + (1-\rho_i(t))\Gamma_i(t), \quad (\text{S8})$$

85

86

87

88

89

90

where the first term on the right side is the fraction of infected individuals who do not recover. The infected individuals are those who remain in subpopulation  $i$  and those who migrate to neighboring subpopulations and then return back to subpopulation  $i$ . The second term on the right side accounts for the ratio of susceptible individuals associated with subpopulation  $i$  that are infected at time  $t$ . In this second term,  $\Gamma_i(t)$  denotes the probability that a susceptible individual associated with subpopulation  $i$  becomes infected at time  $t$ , and reads

$$\Gamma_i(t) = (1-p)P_i(t) + p \sum_{j=1}^N R_{ij} P_j(t), \quad (\text{S9})$$

where the first term on the right side is the probability that susceptible individuals, who do not move, get infected in the resident subpopulation i at time t, and the second term denotes the probability that individuals get infected when migrating to any neighboring subpopulation. And  $P_i(t)$  is denoted as

$$P_i(t) = 1 - \prod_{j=1}^N (1 - \lambda_i(t) \rho_j(t))^{n_{j \rightarrow i}}, \quad (\text{S10})$$

where  $n_{j \rightarrow i}$  denotes the population flux moving from subpopulation j to subpopulation i, and reads

$$n_{j \rightarrow i} = \delta_{ij} (1-p) n_i + p R_{ji} n_j, \quad (\text{S11})$$

with  $\delta_{ij}=1$  if  $i=j$  and otherwise  $\delta_{ij}=0$ .

To analyze the steady state of the dynamics when  $t \rightarrow \infty$ , namely  $\rho_i(t+1) = \rho_i(t) = \rho_i$ , we can simplify Eq.(S7) as:

$$[1 - (1-p)(1-\mu_i) - p \sum_j R_{ij} (1-\mu_j)] \rho_i = (1-\rho_i) \Gamma_i, \quad (\text{S12})$$

where  $\rho_i$  is the steady density of infected individuals associated to subpopulation i.

When close to the critical point, let's denote  $\rho_i = \varepsilon_i^* \ll 1$  for any subpopulation i. We estimate

$$\mu_i = \mu(1 + \varepsilon \omega_i) \text{ neglecting second order terms from Eq. (S6), and } \omega_i \approx \theta [1 + \frac{k_i q_0 (1-\alpha)}{1 + e^{0.5\beta}}].$$

We denote left side of Eq. (S12) as follows:

$$[1 - (1-p)(1-\mu_i) - p \sum_j R_{ij} (1-\mu_j)] \varepsilon_i^* = T \varepsilon_i^*, \quad (\text{S13})$$

$$\text{where } T = 1 - (1-p)(1-\mu_0 [1 + \varepsilon \theta (1 + \frac{k_i q_0 (1-\alpha)}{1 + e^{0.5\beta}})]) - p \sum_j R_{ij} (1-\mu_0 [1 + \varepsilon \theta (1 + \frac{k_i q_0 (1-\alpha)}{1 + e^{0.5\beta}})]).$$

On the right side of Eq. (S12), we have

$$P_i(t) \approx \sum_{j=1}^N \lambda_i \rho_j n_{j \rightarrow i},$$

$$n_{j \rightarrow i} = \delta_{ij} (1-p) n_i + p_d R_{ji} n_j,$$

$$\Gamma_i \approx (1-p) \sum_{j=1}^N \lambda_i \rho_j n_{j \rightarrow i} + p \sum_{j=1}^N R_{ij} \sum_{l=1}^N \lambda_j \rho_l n_{l \rightarrow j}, \text{ so}$$

$$\Gamma_i = \lambda \sum_{j=1}^N \left\{ (1-p)^2 \delta_{ij} n_j + p(1-p) R_{ji} n_j + p(1-p) \theta \left[ \frac{q_0(1-\alpha)}{1+e^{0.5\beta}} (c-1) + 1 \right] R_{ij} n_j + p^2 \theta \left[ \frac{q_0(1-\alpha)}{1+e^{0.5\beta}} (c-1) + 1 \right] (\mathbf{R} \bullet \mathbf{R}^T)_{ij} n_j \right\} \varepsilon_j^* .$$

$$\text{We denote } \mathbf{M}_{ij} = (1-p)^2 \delta_{ij} n_j + p(1-p) R_{ji} n_j + p(1-p) \theta \left[ \frac{q_0(1-\alpha)}{1+e^{0.5\beta}} (c-1) + 1 \right] R_{ij} n_j + p^2 \theta \left[ \frac{q_0(1-\alpha)}{1+e^{0.5\beta}} (c-1) + 1 \right] (\mathbf{R} \bullet \mathbf{R}^T)_{ij} n_j$$

116

117 Accordingly, we derive epidemic threshold  $\lambda_c$  as follows:

$$\lambda_c = \frac{T}{\Lambda_{\max}(\mathbf{M})}, \quad (\text{S14})$$

119 where  $\Lambda_{\max}(\mathbf{M})$  is the maximum eigenvalue of the matrix  $\mathbf{M}$ . Unfortunately, the detailed  
 120 expression for the maximum eigenvalue of the matrix  $\mathbf{M}$  is impossible. Nevertheless, we can get the  
 121 epidemic threshold by numerical iteration.

122

123

## Sigmoid function

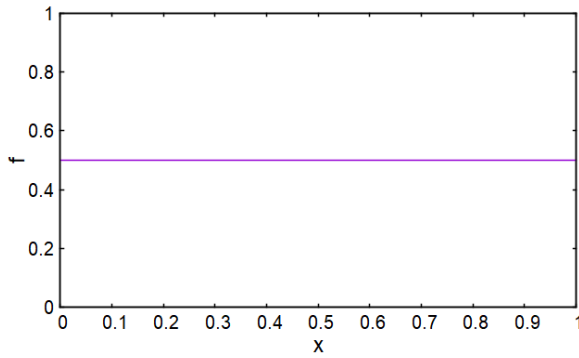

(a)  $\beta=0$

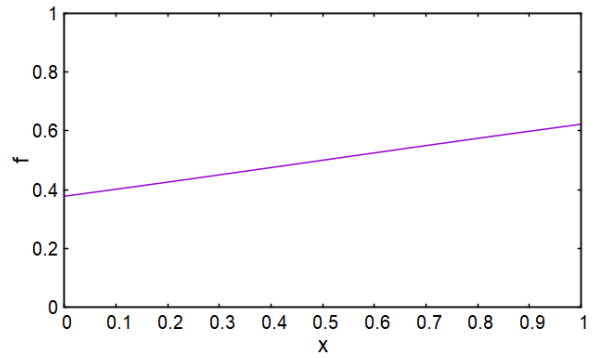

(b)  $\beta=1$

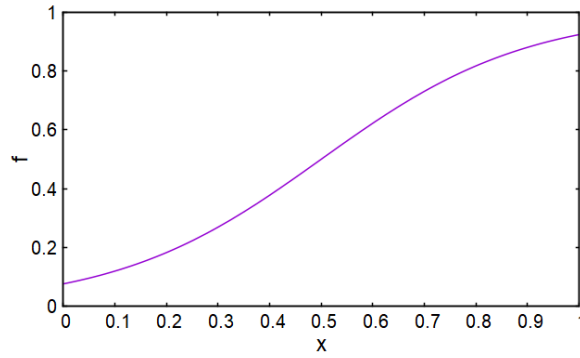

(c)  $\beta=5$

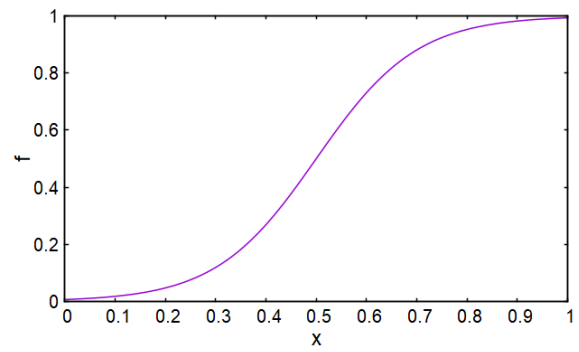

(d)  $\beta=10$

**Fig. S1** Sigmoid function  $f(x) = \frac{1}{1 + e^{-\beta(x-0.5)}}$  corresponding to various values of parameter  $\beta$ . The function become constant 0.5 when  $\beta=0$ . The lower  $\beta$  presents a more steady growth with a higher initial function value.

133

## Effects of the parameter $\alpha$

134

### The time evolution of the epidemic under HOD and HED

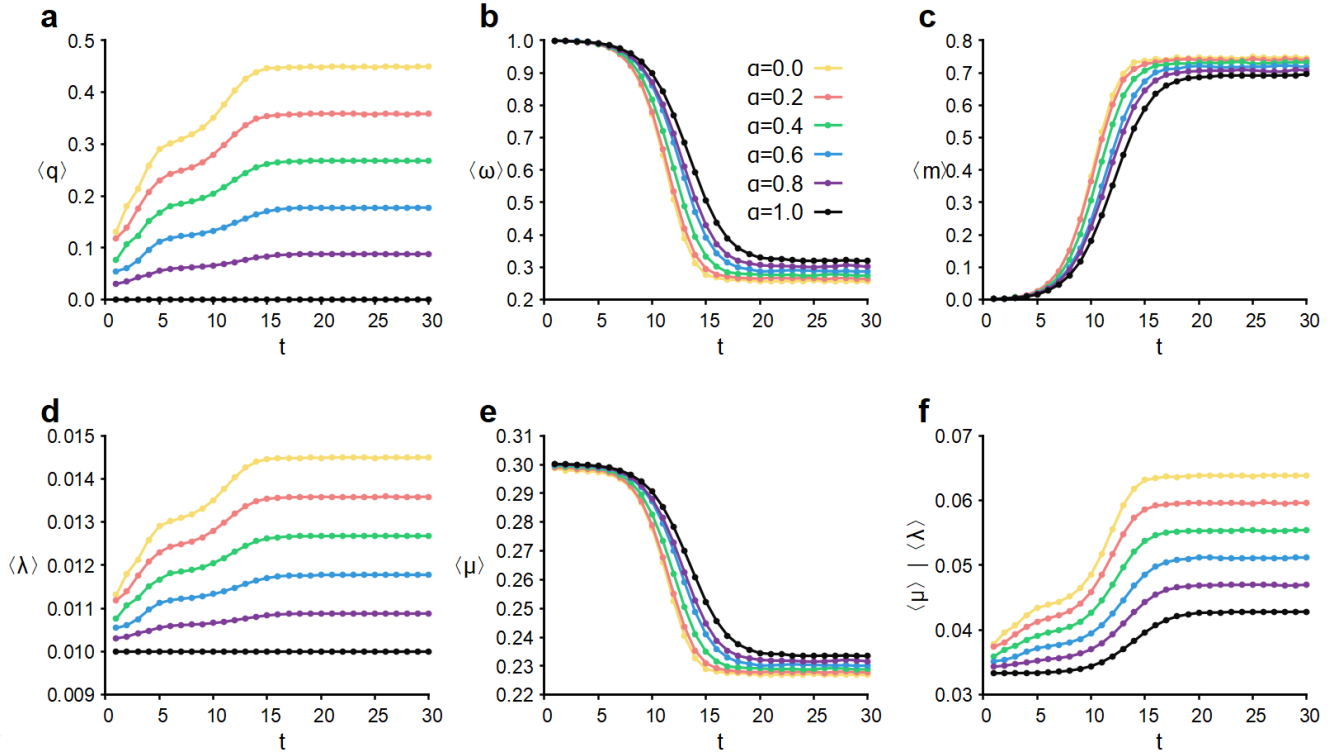

135

136

137

138

139

140

**Fig. S2** The time evolution of six average values of all subpopulations for various values of  $\alpha$  by MC simulation under HOD when  $\lambda=0.01$  (the legend in (b)). (a)-(f) are average values corresponding to donation will  $\langle q \rangle$ , holding resources  $\langle \omega \rangle$ , infection ratio of individuals in neighboring subpopulations  $\langle m \rangle$ , infection rate  $\langle \lambda \rangle$ , recover rate  $\langle \mu \rangle$ , and effective infection rate  $\langle \lambda \rangle / \langle \mu \rangle$ , respectively.

141

142

143

144

145

146

147

148

149

150

151

152

The average infection ratio of individuals in neighboring subpopulations increases promptly as shown in (c), and the lower  $\alpha$  is, the faster it increases. When infected individuals emerge in subpopulations, they will release/receive resources to/from neighbors. As we can see from (a), the average donation will increases with time when  $\alpha$  is not equal to 1, and a lower  $\alpha$  induces a higher donation will. However, a higher donation will of one subpopulation induces a higher infection rate as shown in (d). At the same time, because the increasing of infected individuals induces a lower ability of resource production, the average resources of each subpopulation become fewer and fewer as shown in (b). Meanwhile, the recovery rate of one subpopulation is positive correlated to its current resources, so we can see a same trend shown in (e). In order to clearly present the relationship between average infection rate and average recovery rate, the time evolution of average effective infection rate is shown in (f), and we can see the growth whatever the value of  $\alpha$  is.

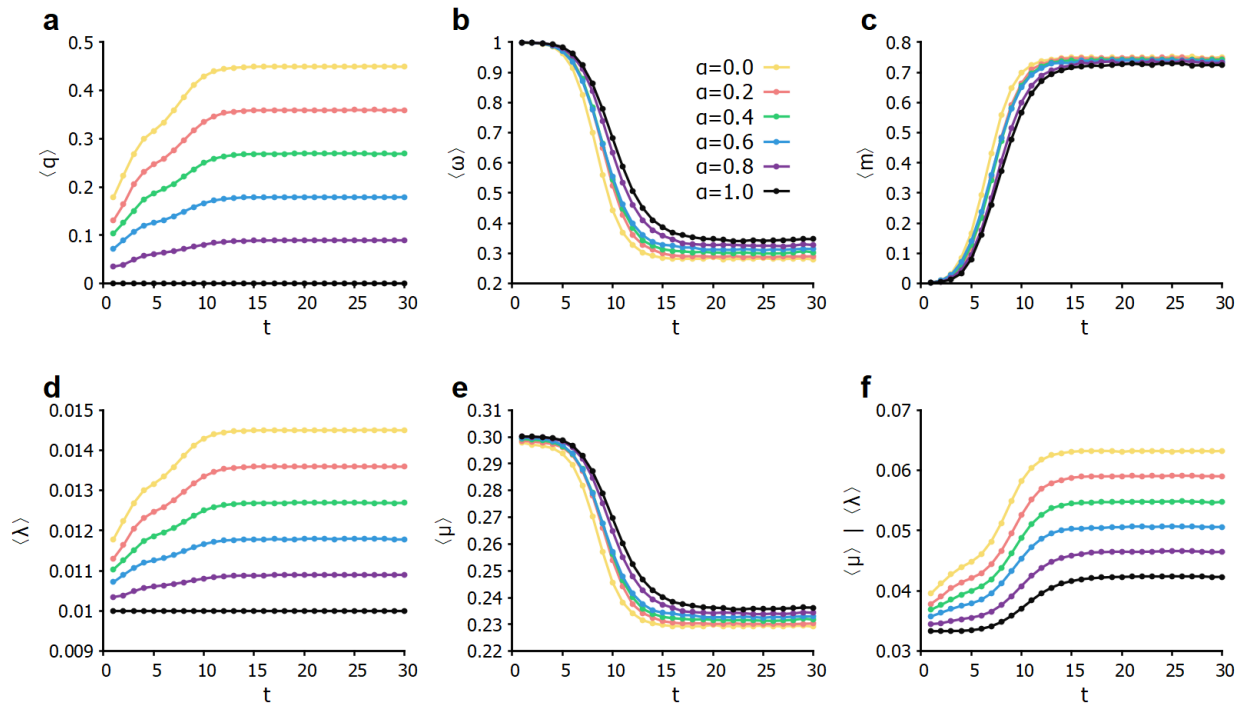

154

155 **Fig. S3** The time evolution of six average values of all subpopulations for various values of  $\alpha$   
 156 by MC simulation under HED when  $\lambda=0.01$  (the legend in (b)). (a)-(f) are average values  
 157 corresponding to donation will  $\langle q \rangle$ , holding resources  $\langle \omega \rangle$ , infection ratio of individuals in  
 158 neighboring subpopulations  $\langle m \rangle$ , infection rate  $\langle \lambda \rangle$ , recover rate  $\langle \mu \rangle$ , and effective infection rate  
 159  $\langle \lambda \rangle / \langle \mu \rangle$ , respectively.

160 The figures appear a similar trend with previous HOD, but the epidemic reaches a steady state  
 161 in a shorter time.

162

163



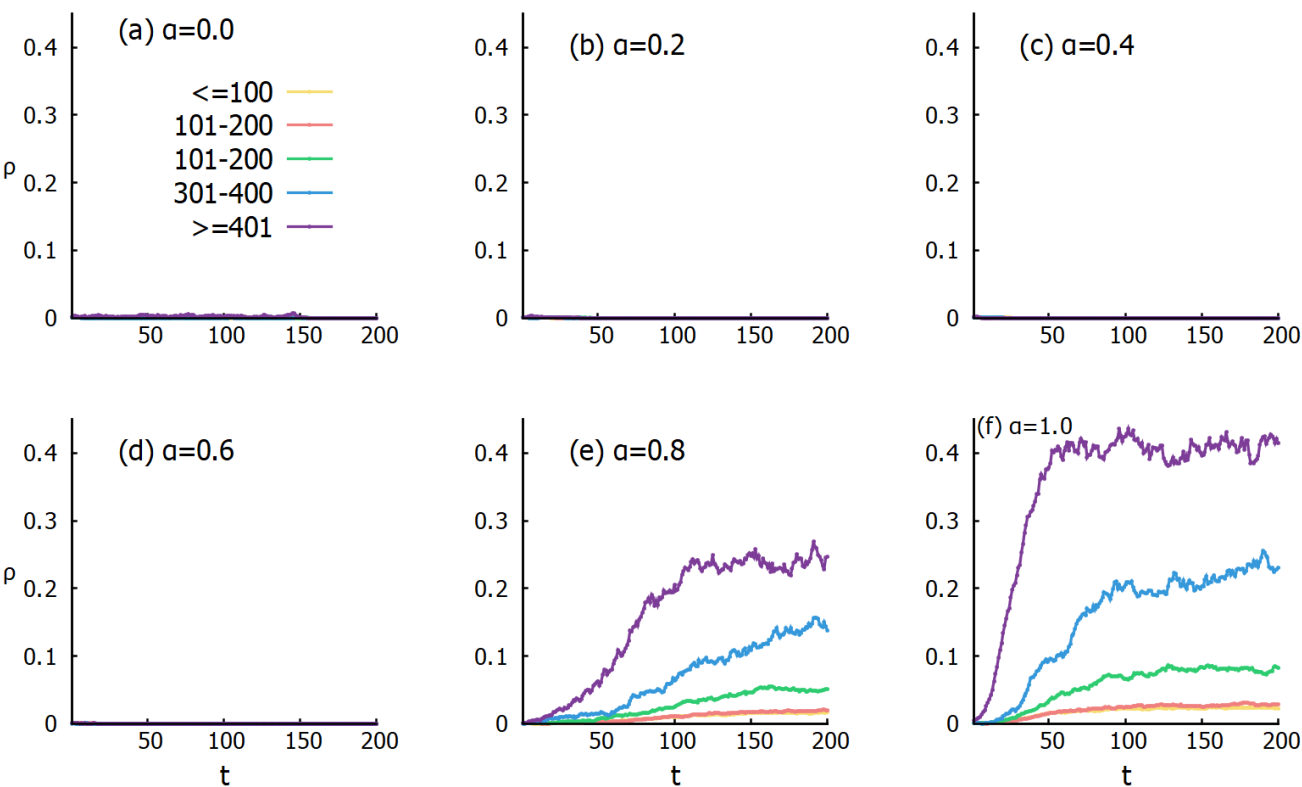

165  
166 **Fig. S4** The time evolution of the prevalence  $\rho$  for five subpopulation groups under various values of  
167  $\alpha$  when  $\lambda=0.0015$ . (a)-(f) correspond to parameter  $\alpha=0.0, 0.2, 0.4, 0.6, 0.8$ , and  $1.0$ , respectively (The  
168 legend represents subpopulation groups shown in (a)).

169 As the population distribution is heterogeneous under HED, for further interpreting the role of  
170 awareness  $\alpha$  when close to threshold, we group subpopulations according to its population, and set  $\lambda$   
171 at  $0.0015$ . Apparently,  $\alpha=1.0$  denotes there is no resource donation. From (a)-(d), the epidemic can't  
172 spread in all the subpopulation groups under  $\alpha=0.0, 0.2, 0.4$ , and  $0.6$ , respectively; whereas the  
173 epidemic breaks out, particular subpopulations with more population, when awareness  $\alpha=0.8$  and  $1.0$   
174 as shown in (e) and (f), respectively.

175  
176  
177

## Effects of the parameter $\beta$

### 179 The time evolution of epidemic under HOD and HED

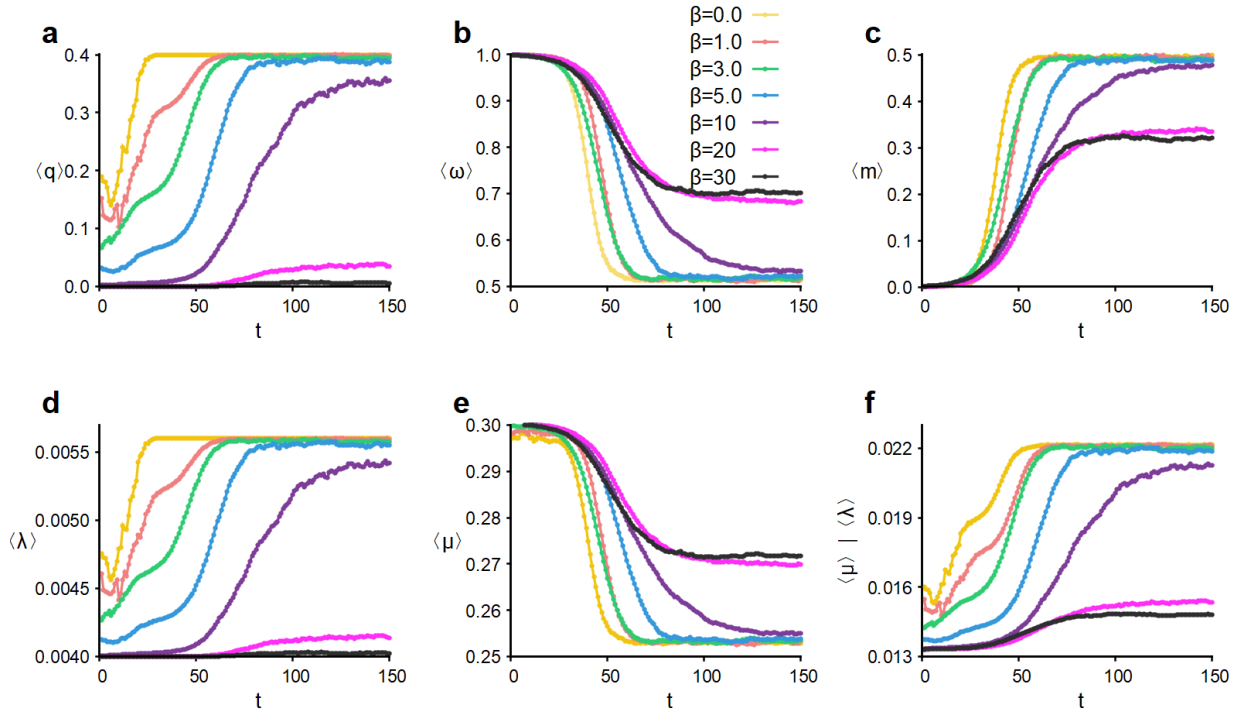

180

181 **Fig. S5** The time evolution of six average values of all subpopulations for various values of  $\beta$  by  
 182 MC simulation under **HOD** when  $\lambda=0.004$  (the legend in (b)). (a)-(f) are average values  
 183 corresponding to donation will  $\langle q \rangle$ , holding resources  $\langle \omega \rangle$ , infection ratio of individuals in  
 184 neighboring subpopulations  $\langle m \rangle$ , infection rate  $\langle \lambda \rangle$ , recover rate  $\langle \mu \rangle$ , and effective infection rate  
 185  $\langle \lambda \rangle / \langle \mu \rangle$ , respectively.

186

187

188

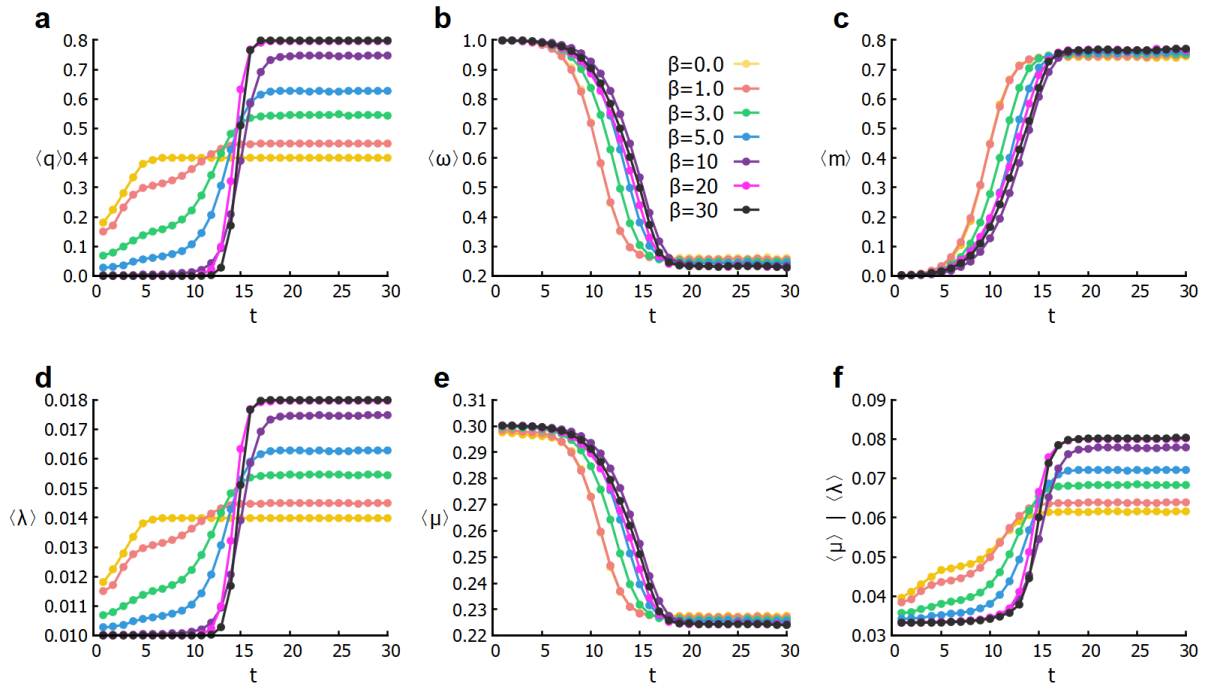

**Fig. S6** The time evolution of six average values of all subpopulations for various values of  $\beta$  by MC simulation under HOD when  $\lambda=0.01$  (the legend in (b)). (a)-(f) are average values corresponding to donation will  $\langle q \rangle$ , holding resources  $\langle \omega \rangle$ , infection ratio of individuals in neighboring subpopulations  $\langle m \rangle$ , infection rate  $\langle \lambda \rangle$ , recover rate  $\langle \mu \rangle$ , and effective infection rate  $\langle \lambda \rangle / \langle \mu \rangle$ , respectively.

With time evolution, more infected individuals emerge as shown in Fig. S6 (c). Once infected individuals emerge, subpopulations would increase their donation will to donate resources to others as shown in (a), and a lower  $\beta$  indicates a higher initial donate will. Besides, average infection rate has a similar trend as shown in (d). At the same time, average resources of each subpopulation become less and less as shown in (b) because of the increasing of infected individuals. Hence, average recover rate of the system become lower and lower as shown in (e). We can see the growth of average effective infection rate in (f), and the higher the  $\beta$  is, the higher final average effective infection rate is.

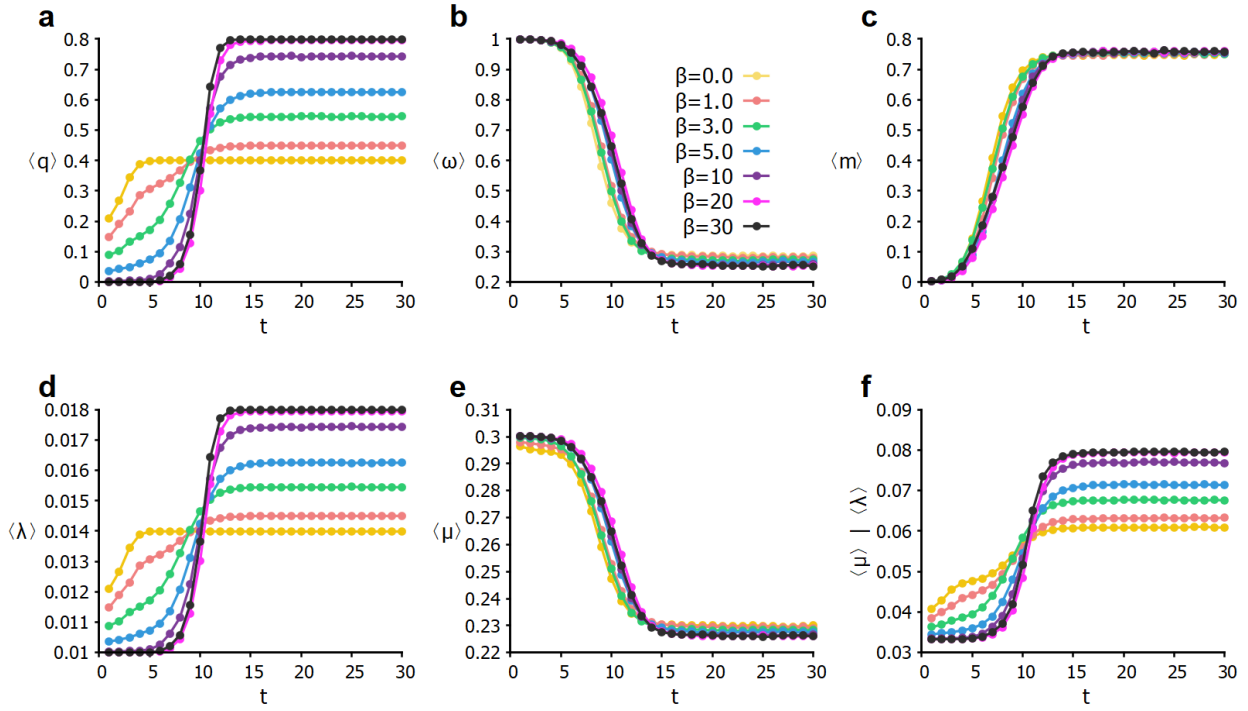

207

208

209

210

211

212

213

214

215

**Fig. S7** The time evolution of six average values of all subpopulations for various values of  $\beta$  by MC simulation under HED when  $\lambda=0.01$  (the legend in (b)). (a)-(f) are average values corresponding to donation will  $\langle q \rangle$ , holding resources  $\langle \omega \rangle$ , infection ratio of individuals in neighboring subpopulations  $\langle m \rangle$ , infection rate  $\langle \lambda \rangle$ , recover rate  $\langle \mu \rangle$ , and effective infection rate  $\langle \lambda \rangle / \langle \mu \rangle$ , respectively.

The figures appear a similar trend as previous situation.

216      Prevalence  $\rho$  for five subpopulation groups under HED

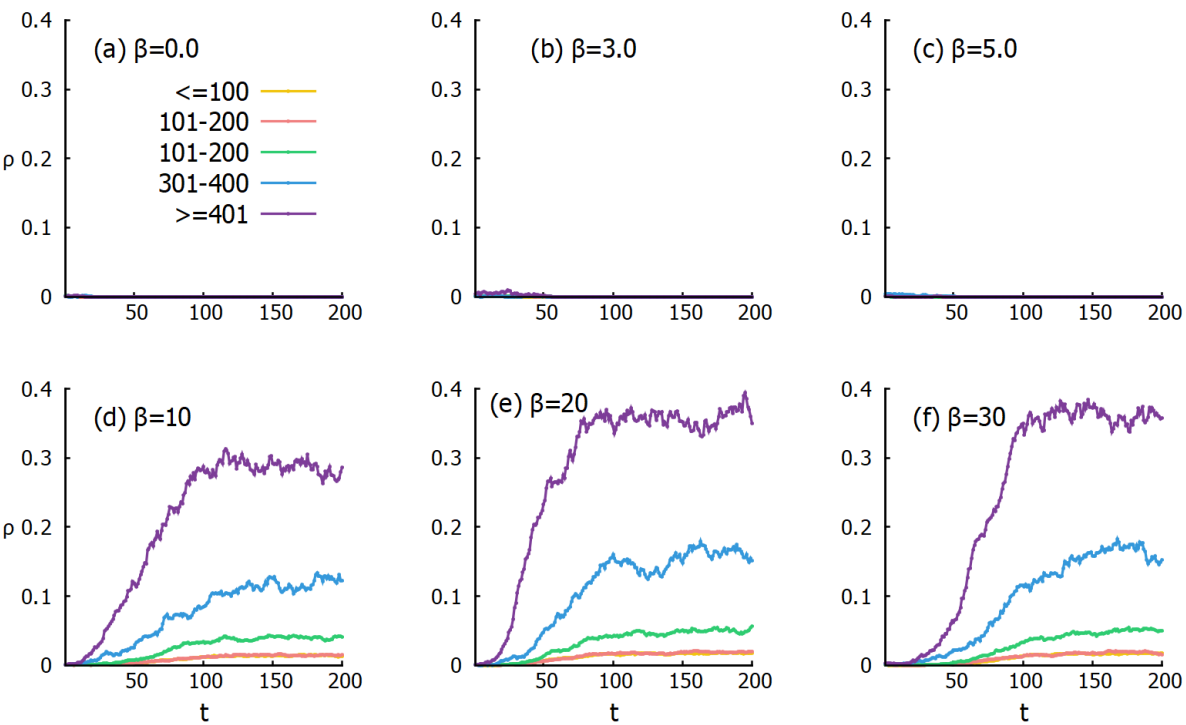

217  
218      **Fig. S8** The time evolution of the prevalence  $\rho$  f for five subpopulation groups under various  
219 values of  $\beta$  when  $\lambda=0.0015$ . (a)-(f) correspond to parameter  $\beta=0.0, 3.0, 5.0, 10, 20$ , and  $30$ ,  
220 respectively (The legend represents subpopulation groups shown in (a)).

221      Because the population distribution is heterogeneous under HED, for further interpreting the role  
222 of the donation sensitivity  $\beta$  when closed to threshold, we group subpopulations according to its  
223 population, and set  $\lambda$  at  $0.0015$ . The donation will keeps a constant when  $\beta=0.0$ . From (a)-(c), the  
224 curves just presents a slight fluctuation initially and finally approach to  $0$  with time evolution, which  
225 suggests that epidemic cannot spread. From (d)-(f), the epidemic easily diffuses especially in  
226 subpopulations with more population, and the curves firstly go up then present steady with the time  
227 evolution.

228  
229  
230  
231

## Effects of the parameter $\theta$

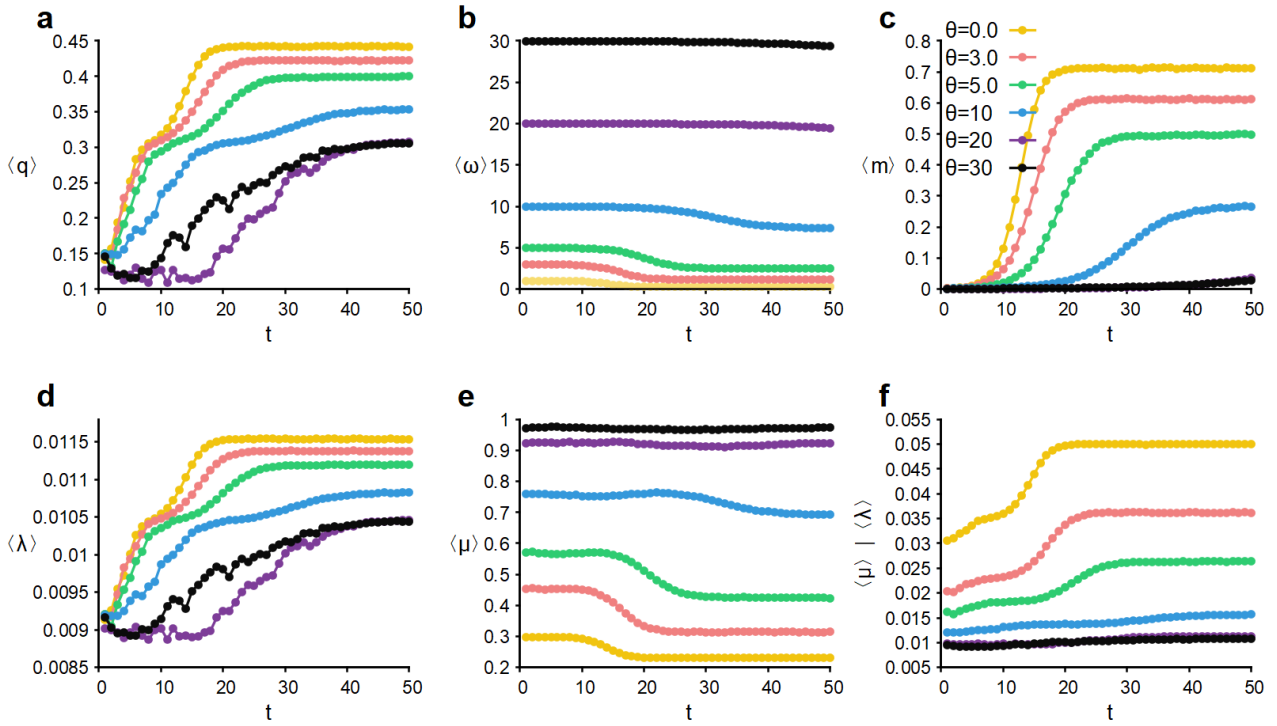

**Fig. S9** The time evolution of six average values of all subpopulations for various values of  $\theta$  by MC simulation under HOD when  $\lambda=0.01$  (the legend in (c)). (a)-(f) are average values corresponding to donation will  $\langle q \rangle$ , holding resources  $\langle \omega \rangle$ , infection ratio of individuals in neighboring subpopulations  $\langle m \rangle$ , infection rate  $\langle \lambda \rangle$ , recover rate  $\langle \mu \rangle$ , and effective infection rate  $\langle \lambda \rangle / \langle \mu \rangle$ , respectively.

In order to explore the time evolution of the epidemic under various values of parameter  $\theta$  when basic infection rate  $\lambda$  is close to thresholds, we set  $\lambda=0.004$ . As we can see from (b) and (e), higher  $\theta$  can effectively increase the average holding resources and average recover rate. From (c) and (f), there is a lower average effective infection rate with a higher  $\theta$ , suppressing the spread of the epidemic validly.

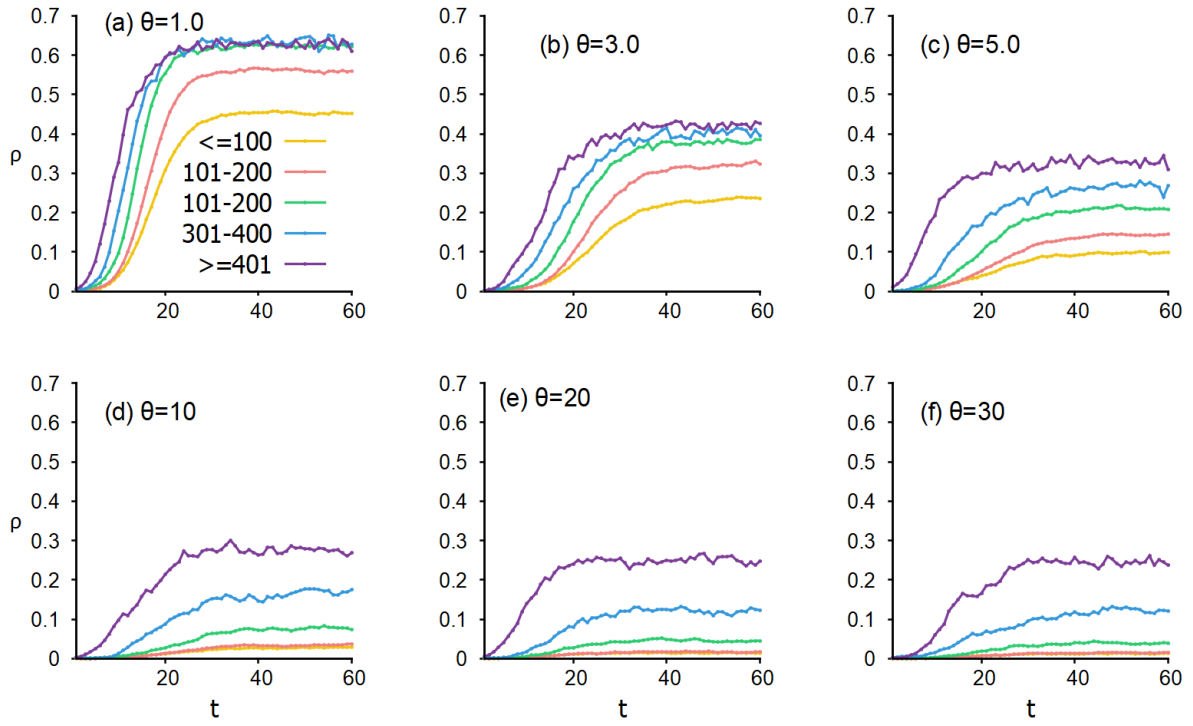

**Fig. S10** The time evolution of the prevalence  $\rho$  for five subpopulation groups under various values of  $\theta$  when  $\lambda=0.01$ . (a)-(f) correspond to parameter  $\theta=1.0, 3.0, 5.0, 10, 20$ , and  $30$ , respectively (The legend represents subpopulation groups shown in (a)).

As the population distribution is heterogeneous under HED, for further interpreting the role of the productive strength  $\theta$ , we group subpopulations according to its population, and set  $\lambda$  at  $0.01$ . From (a)-(d), we can obviously find that high  $\theta$  can effectively reduce final prevalence. However, when  $\theta=20$  or larger as shown in (e) and (f), there is few changes on reducing final prevalence because of not obviously increase of the recovery rate. These results suggest it is conducive to control epidemic when we strengthen the speed of resource production such as extending working hours properly.

## Supplementary References

1. Chen, X. L., Liu, Q. H., Wang, R. J., Li, Q. & Wang, W. Self-Awareness-Based Resource Allocation Strategy for Containment of Epidemic Spreading. *Complexity* 2020(2020).
2. Gómez-Gardeñes, J., Soriano-Paños, D. & Arenas, A. Critical regimes driven by recurrent mobility patterns of reaction–diffusion processes in networks. *Nat. Phys.* **14**, 391-395 (2018).
3. Davis, J. T., Perra, N., Zhang, Q., Moreno, Y. & Vespignani, A. Phase transitions in information spreading on structured populations. *Nat. Phys.* **16**, 590-596(2020).
4. Colizza, V., Pastor-Satorras, R. & Vespignani, A. Reaction–diffusion processes and metapopulation models in heterogeneous networks. *Nat. Phys.* **3**, 276-282 (2007).
5. Wang, B., Gou, M., Guo, Y., Tanaka, G. & Han, Y. Network structure-based interventions on spatial spread of epidemics in metapopulation networks. *Phys. Rev. E* **102** (2020).
6. Worby, C. J. & Chang, H. H. Face mask use in the general population and optimal resource allocation during the COVID-19 pandemic. *Nat. Commun.* **11** (2020).
